# Supplementary material for: Safety and Efficacy of Midface Augmentation Using Bio-Oss Bone Powder and Bio-Gide Collagen Membrane in Asians
Source: MDPI journal article supplement (doi:10.3390/jcm12030959), 2023-01-26
Supplement: s1 [file s1]

**Supplementary Table S1. Nasolabial Folds Assessment according to  
Wrinkle Severity Rating Scale before Midface Augmentation**

| Grade           | Description                                                                                                         | N  | %    |
|-----------------|---------------------------------------------------------------------------------------------------------------------|----|------|
| 1 (absent)      | No visible fold; continuous skin line.                                                                              | 1  | 1.2  |
| 2 (mild)        | Shallow but visible fold with a slight indentation;<br>minor facial feature.                                        | 39 | 45.9 |
| 3<br>(moderate) | Moderately deep folds; clear facial features visible<br>at normal appearance but not when stretched.                | 41 | 48.2 |
| 4 (severe)      | Very long and deep folds, prominent facial<br>features; Less than 2 mm visible fold when<br>stretched.              | 4  | 4.7  |
| 5<br>(extreme)  | Extremely deep and long folds, detrimental to<br>facial appearance; 2–4 mm visible V-shaped fold<br>when stretched. | 0  | 0    |

**Supplementary Table S2. Results of Patient Self-Evaluation at Week 24**

|                             |     | N  | %    |
|-----------------------------|-----|----|------|
| Overall satisfied           | Yes | 64 | 75.3 |
|                             | No  | 21 | 24.7 |
| Feel more attractive        | Yes | 67 | 78.8 |
|                             | No  | 18 | 21.2 |
| Willingness to recommend to | Yes | 67 | 78.8 |

others

No

18

21.2

---

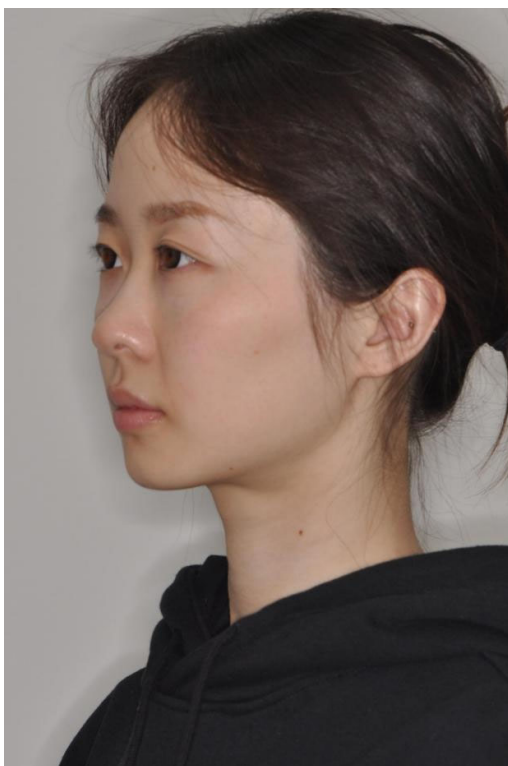

(a)

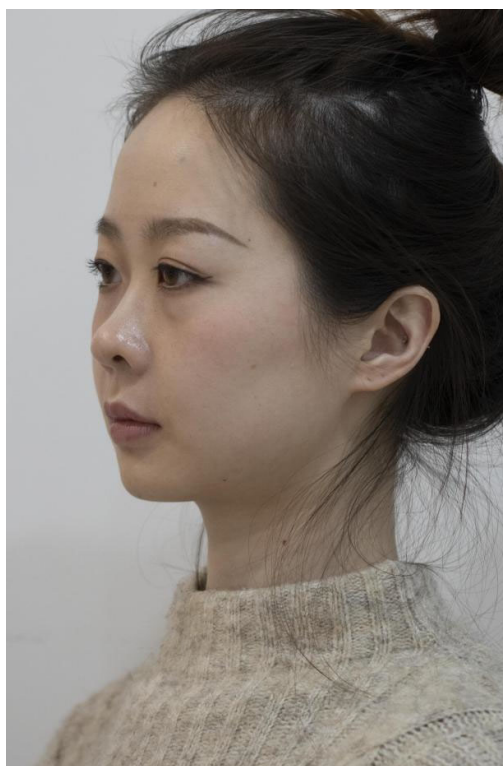

(b)

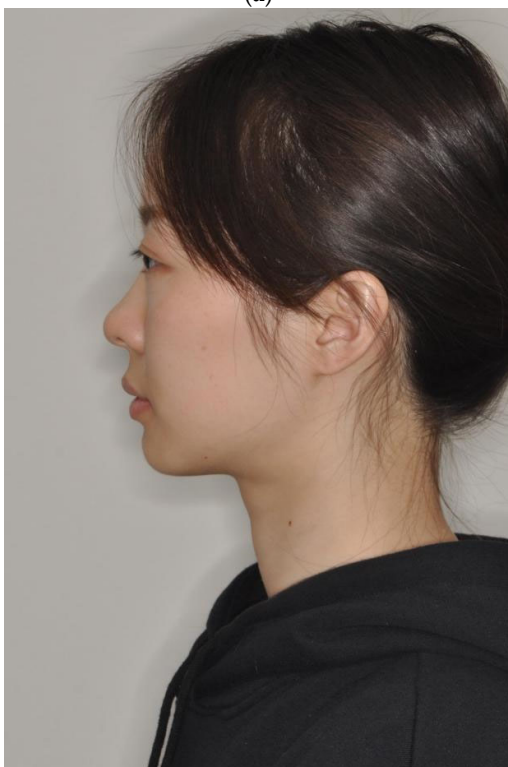

(c)

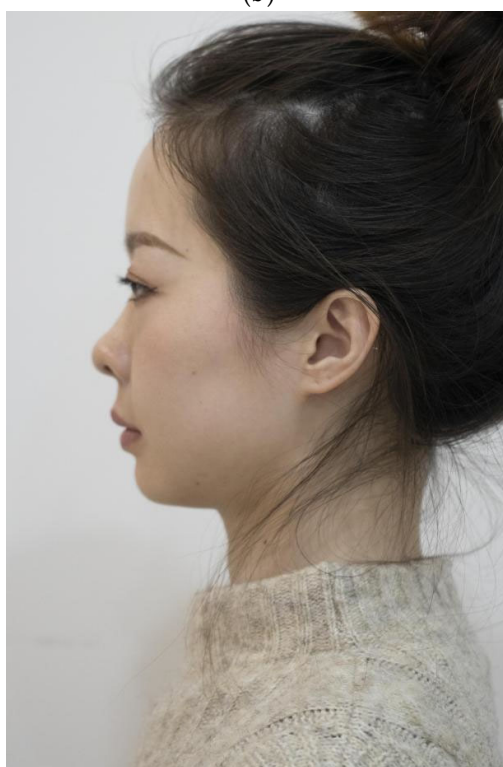

(d)

**Figure S1.** (a) Preoperative oblique view of patient 1; (b) 24 weeks postoperative oblique view of patient 1; (c) preoperative lateral view of patient 1; (d) 24 weeks postoperative lateral view of patient 1.

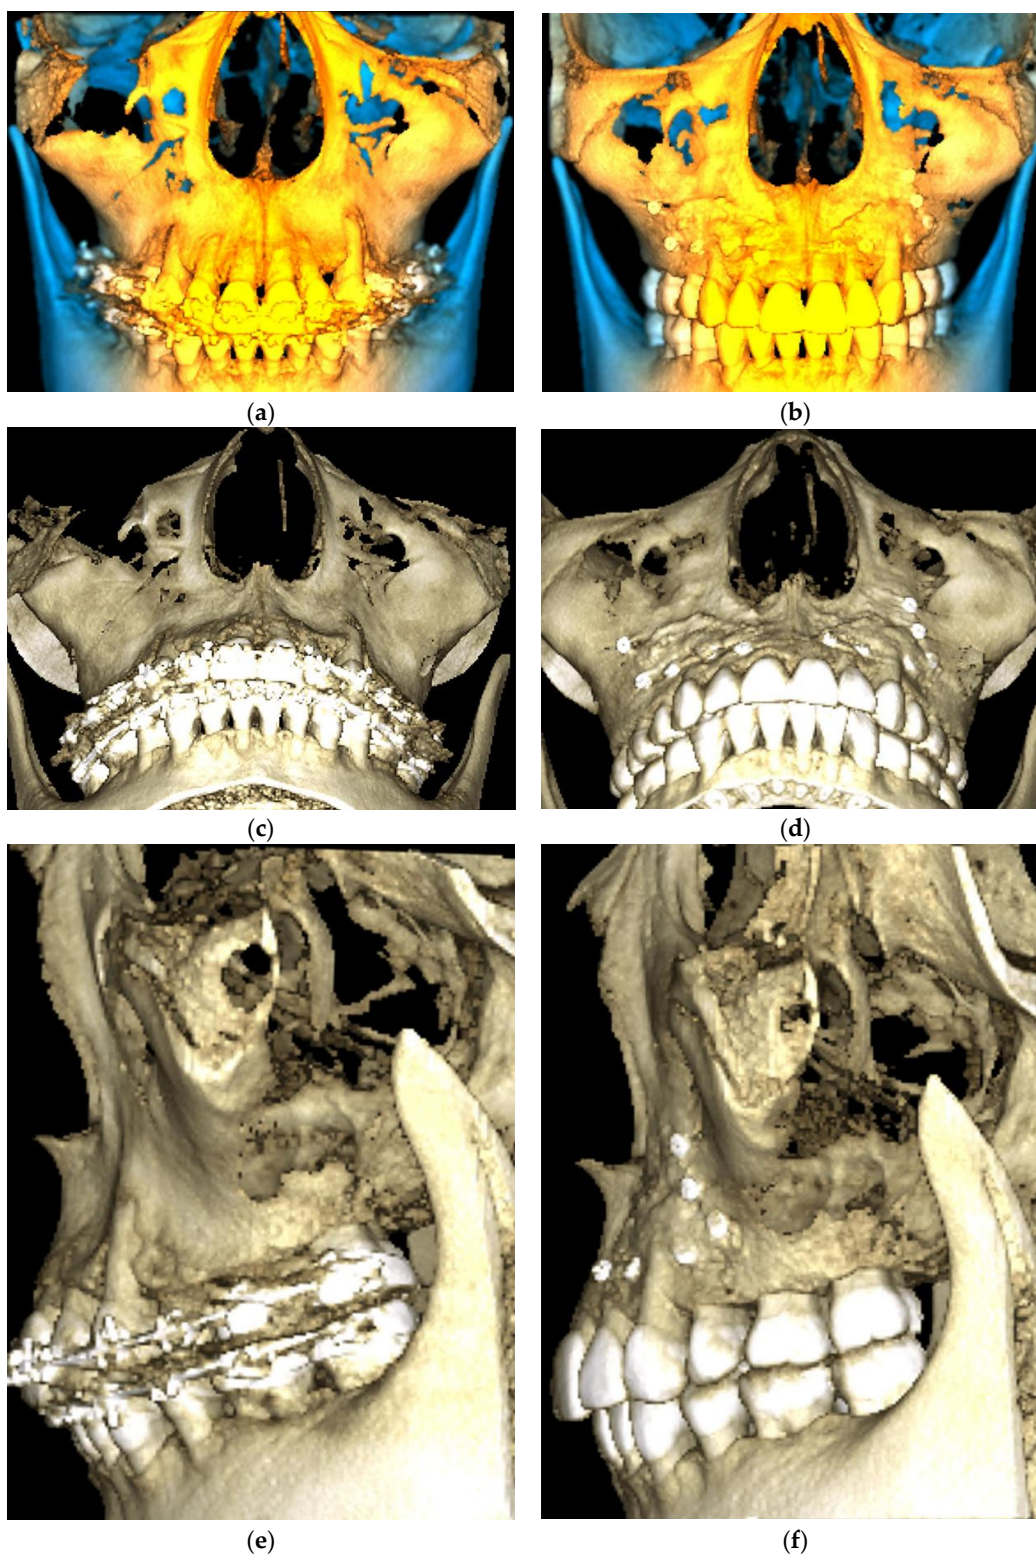

**Figure S2.** (a) Front view of preoperative three-dimensional reconstructed CT image of patient 1; (b) front view of 24 weeks



postoperative three-dimensional reconstructed CT image of patient 1; (c) bottom view of preoperative three-dimensional reconstructed CT image of patient 1; (d) bottom view of 24 weeks postoperative three-dimensional reconstructed CT image of patient 1; (e) lateral view of preoperative three-dimensional reconstructed CT image of patient 1; (f) lateral view of 24 weeks postoperative three-dimensional reconstructed CT image of patient 1.

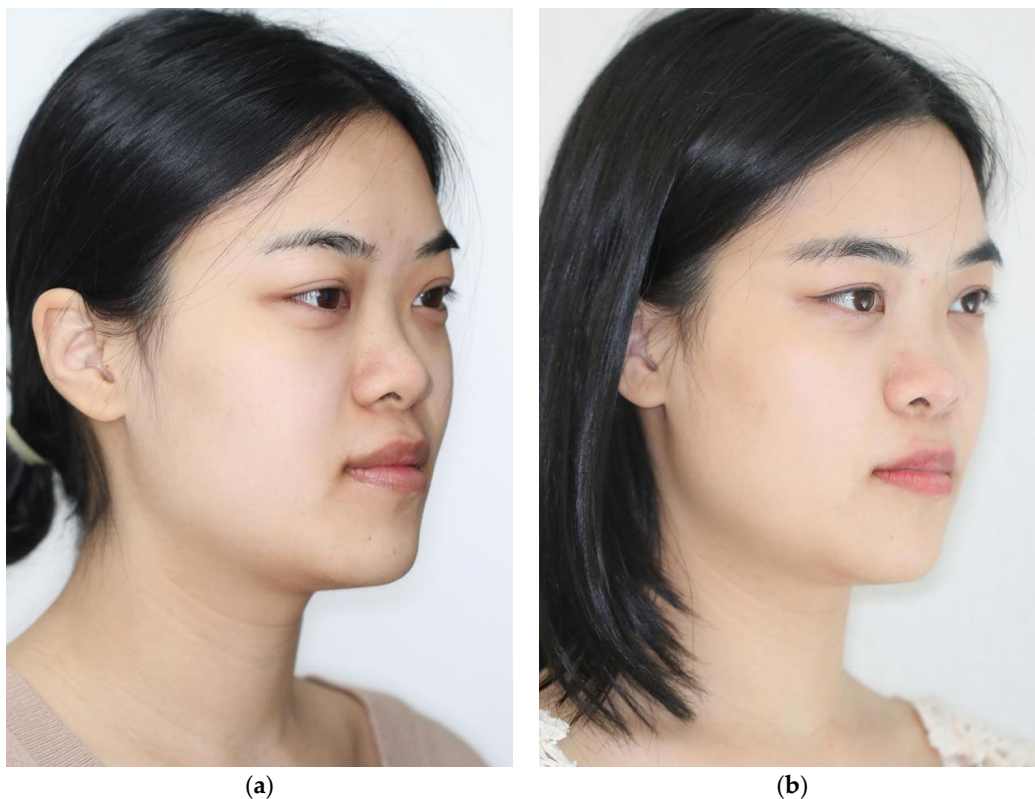

**Figure S3.** (a) Preoperative oblique view of patient 2; (b) 24 weeks postoperative oblique view of patient 2.
